# Supplementary material for: C,N-codoped MoSi2 ceramic with excellent heat resistance for microwaves absorption application
Source: R Soc Open Sci. 2020 Jul 29;7(7):200740. doi: 10.1098/rsos.200740 (PMC7428230; doi:10.1098/rsos.200740)
Supplement: XRD [file rsos200740supp2.xlsx]

## Sheet: 9
Temperature	Weight
°C	%
0	100
1	100.2
2	100.2
3	100.4
4	100.5
5	100.5
6	100.5
7	100.5
8	100.5
9	100.5
10	100.5
11	100.6
12	100.6
13	100.6
14	100.6
15	100.6
16	100.6
17	100.6
18	100.6
19	100.6
20	100.6
21	100.6
22	100.6
23	100.6
24	100.6
25	100.6
26	100.6
27	100.6
28	100.6
29	100.6
30	100.6
31	100.6
32	100.6
33	100.5
34	100.5
35	100.6
36	100.5
37	100.5
38	100.5
39	100.5
40	100.5
41	100.5
42	100.5
43	100.5
44	100.5
45	100.5
46	100.5
47	100.5
48	100.4
49	100.5
50	100.4
51	100.4
52	100.3
53	100.3
54	100.4
55	100.4
56	100.2
57	100.2
58	100.2
59	100.2
60	100.3
61	100.3
62	100.2
63	100.3
64	100.2
65	100.2
66	100.2
67	100.2
68	100.2
69	100.2
70	100.2
71	100.2
72	100.1
73	100.1
74	100
75	100.1
76	100.1
77	100.1
78	100.1
79	100.1
80	100.1
81	100.1
82	100.1
83	100.1
84	100
85	100.1
86	100
87	100
88	100
89	100.1
90	100.1
91	100.1
92	100.1
93	100.1
94	100.1
95	100
96	100
97	100.1
98	100.1
99	100.1
100	100.1
101	100.2
102	100.1
103	100.2
104	100.1
105	100.1
106	100
107	100.1
108	100.1
109	100.2
110	100.2
111	100.1
112	100
113	100
114	100
115	100.1
116	100.1
117	100.1
118	100.1
119	100.2
120	100.3
121	100.3
122	100.3
123	100.3
124	100.4
125	100.3
126	100.3
127	100.3
128	100.3
129	100.4
130	100.5
131	100.6
132	100.6
133	100.6
134	100.7
135	100.7
136	100.7
137	100.8
138	100.7
139	100.8
140	100.8
141	100.7
142	100.5
143	100.5
144	100.5
145	100.4
146	100.3
147	100.3
148	100.3
149	100.4
150	100.3
151	100.2
152	100.2
153	100.2
154	100.1
155	100.2
156	100
157	100.1
158	100
159	100
160	100.1
161	99.98
162	99.96
163	99.96
164	99.95
165	99.95
166	99.88
167	99.85
168	99.87
169	99.86
170	99.83
171	99.78
172	99.85
173	99.79
174	99.79
175	99.76
176	99.79
177	99.79
178	99.98
179	100
180	99.86
181	99.88
182	99.86
183	99.75
184	99.69
185	99.71
186	99.65
187	99.63
188	99.75
189	99.58
190	99.57
191	99.6
192	99.57
193	99.55
194	99.51
195	99.51
196	99.56
197	99.53
198	99.48
199	99.65
200	99.48
201	99.42
202	99.44
203	99.35
204	99.39
205	99.35
206	99.35
207	99.33
208	99.32
209	99.27
210	99.29
211	99.26
212	99.28
213	99.27
214	99.3
215	99.32
216	99.35
217	99.34
218	99.41
219	99.44
220	99.48
221	99.49
222	99.57
223	99.5
224	99.45
225	99.48
226	99.48
227	99.52
228	99.52
229	99.58
230	99.64
231	99.71
232	99.67
233	99.67
234	99.63
235	99.68
236	99.64
237	99.64
238	99.67
239	99.68
240	99.68
241	99.69
242	99.68
243	99.61
244	99.63
245	99.6
246	99.55
247	99.55
248	99.56
249	99.52
250	99.52
251	99.51
252	99.5
253	99.48
254	99.48
255	99.47
256	99.49
257	99.47
258	99.45
259	99.49
260	99.47
261	99.46
262	99.46
263	99.45
264	99.45
265	99.44
266	99.48
267	99.53
268	99.56
269	99.61
270	99.62
271	99.62
272	99.58
273	99.61
274	99.66
275	99.74
276	99.77
277	99.85
278	99.92
279	99.98
280	99.96
281	99.99
282	99.95
283	99.93
284	99.94
285	99.91
286	99.89
287	99.92
288	99.83
289	99.84
290	99.8
291	99.83
292	99.78
293	99.8
294	99.75
295	99.75
296	99.8
297	99.75
298	99.67
299	99.67
300	99.67
301	99.72
302	99.67
303	99.7
304	99.76
305	99.78
306	99.8
307	99.78
308	99.78
309	99.8
310	99.83
311	99.85
312	99.79
313	99.75
314	99.7
315	99.7
316	99.62
317	99.61
318	99.57
319	99.56
320	99.55
321	99.45
322	99.45
323	99.44
324	99.47
325	99.49
326	99.49
327	99.47
328	99.52
329	99.55
330	99.49
331	99.57
332	99.56
333	99.54
334	99.53
335	99.6
336	99.72
337	99.69
338	99.76
339	99.78
340	99.72
341	99.66
342	99.68
343	99.69
344	99.61
345	99.57
346	99.54
347	99.36
348	99.08
349	99.2
350	99.02
351	99.03
352	98.99
353	98.87
354	98.9
355	98.85
356	98.88
357	98.96
358	99.09
359	99.1
360	99.16
361	99.21
362	99.29
363	99.31
364	99.33
365	99.39
366	99.46
367	99.64
368	99.75
369	99.83
370	99.83
371	99.75
372	99.67
373	99.73
374	99.81
375	99.86
376	99.91
377	99.96
378	99.99
379	100
380	100.1
381	100.1
382	100.1
383	100.1
384	100.1
385	100.1
386	100.1
387	100.2
388	100.2
389	100.1
390	100.1
391	100.2
392	100.2
393	100.2
394	100.3
395	100.2
396	100.3
397	100.3
398	100.4
399	100.6
400	100.7
401	100.8
402	100.9
403	101
404	101.1
405	101.1
406	101
407	101
408	101
409	101.1
410	101.1
411	101
412	101.1
413	101
414	101.1
415	101.2
416	101.2
417	101.1
418	101.2
419	101.1
420	101.1
421	101.1
422	101.1
423	101.1
424	101.1
425	101
426	101
427	101
428	101
429	101
430	100.9
431	100.8
432	100.8
433	100.8
434	100.8
435	100.8
436	100.8
437	100.7
438	100.7
439	100.6
440	100.6
441	100.6
442	100.6
443	100.6
444	100.6
445	100.6
446	100.7
447	100.7
448	100.7
449	100.9
450	101
451	101
452	101
453	101
454	101
455	101
456	101
457	101
458	101.1
459	101.1
460	101.1
461	101.3
462	101.4
463	99.64
464	98.54
465	98.4
466	98.39
467	98.34
468	98.43
469	98.43
470	98.46
471	98.41
472	98.47
473	98.53
474	98.52
475	98.52
476	98.64
477	98.69
478	98.61
479	98.63
480	98.66
481	98.73
482	98.65
483	98.62
484	98.66
485	98.67
486	98.74
487	98.67
488	98.75
489	98.88
490	98.79
491	98.77
492	98.94
493	98.93
494	98.94
495	99.09
496	99.03
497	98.95
498	98.88
499	98.98
500	99.01
501	99.13
502	99.07
503	99.05
504	99.11
505	99.14
506	99.28
507	99.4
508	99.44
509	99.55
510	99.7
511	99.8
512	99.91
513	99.99
514	100.1
515	100.2
516	100.3
517	100.4
518	100.5
519	100.6
520	100.7
521	100.8
522	100.9
523	101.1
524	101.1
525	101.1
526	101
527	101
528	101
529	101
530	101
531	101
532	101
533	101
534	101
535	101
536	101
537	101
538	101
539	101.1
540	101.1
541	101.1
542	101.2
543	101.2
544	101.2
545	101.3
546	101.3
547	101.3
548	101.3
549	101.5
550	101.4
551	101.5
552	101.5
553	101.5
554	101.6
555	101.5
556	101.4
557	101.4
558	101.4
559	101.4
560	101.3
561	101.3
562	101.2
563	101.3
564	101.2
565	101.1
566	101.2
567	101.2
568	101.1
569	101.2
570	101.2
571	101.2
572	101.3
573	101.3
574	101.3
575	101.2
576	101.2
577	101.1
578	101.1
579	101
580	100.9
581	100.8
582	100.6
583	100.6
584	100.7
585	100.7
586	100.5
587	100.4
588	100.4
589	100.5
590	100.3
591	100.4
592	100.4
593	100.3
594	100.4
595	100.4
596	100.5
597	100.5
598	100.4
599	100.5
600	100.7
601	100.8
602	100.9
603	100.9
604	100.9
605	101
606	101
607	101.1
608	101.2
609	101.1
610	101.2
611	101.2
612	101.2
613	101.2
614	101.2
615	101.2
616	101.2
617	101.1
618	101
619	100.9
620	101
621	101
622	101
623	101
624	101.1
625	101.2
626	101.3
627	101.2
628	101.2
629	101.4
630	101.5
631	101.5
632	101.8
633	102
634	102.3
635	102.4
636	102.4
637	102.5
638	102.5
639	102.6
640	102.3
641	102.5
642	102.6
643	102.6
644	102.7
645	102.7
646	102.7
647	102.7
648	102.8
649	102.7
650	102.8
651	102.8
652	102.8
653	102.8
654	102.8
655	102.6
656	102.6
657	102.7
658	102.7
659	102.7
660	102.8
661	102.7
662	102.8
663	102.7
664	102.8
665	102.8
666	102.9
667	102.8
668	102.8
669	102.4
670	102.5
671	102.4
672	102.3
673	102.2
674	102.3
675	102.3
676	102.4
677	102.4
678	102.6
679	102.6
680	102.6
681	102.5
682	102
683	101.9
684	101.7
685	101.8
686	101.9
687	101.9
688	102.1
689	102.4
690	102.5
691	102.7
692	102.9
693	103.1
694	103.2
695	103.3
696	103.3
697	103.8
698	103.5
699	104
700	102.4
701	103.5
702	102.6
703	103.6
704	102.4
705	102.1
706	103.4
707	103
708	102.9
709	103.2
710	103.5
711	104
712	104.3
713	104.6
714	104.9
715	105.1
716	105.3
717	105.3
718	105.3
719	105.4
720	105.6
721	105.7
722	103.8
723	105
724	103.2
725	104.2
726	103.7
727	103.7
728	103.5
729	102.8
730	103.4
731	103
732	102.7
733	102.6
734	102.7
735	103
736	103.2
737	103.3
738	103.4
739	103.6
740	103.8
741	104.2
742	104.6
743	104.8
744	105.1
745	105.6
746	105.9
747	105.9
748	105.9
749	105.8
750	104.2
751	104
752	104.3
753	104.5
754	104.5
755	104.6
756	104.5
757	104.6
758	104.5
759	104.4
760	104.2
761	103.8
762	103.7
763	103.4
764	103.3
765	103.2
766	103.3
767	103.3
768	103.4
769	103.6
770	103.7
771	103.7
772	103.9
773	104.1
774	104.4
775	104.6
776	104.8
777	105.1
778	105.2
779	105.3
780	105.6
781	105.6
782	105.3
783	105.4
784	105.4
785	105.6
786	105.9
787	106.4
788	107
789	107.4
790	107.8
791	105.8
792
793
794
795
796
797
798
799
800
